# Supplementary material for: Pseudomonas PA14H7: Identification and Quantification of the 7-Hydroxytropolone Iron Complex as an Active Metabolite against Dickeya, the Causal Agent of Blackleg on the Potato Plant
Source: MDPI journal article supplement (doi:10.3390/molecules28176207), 2023-08-23
Supplement: s1 [file s1]

# Supplementary materials: *Pseudomonas* PA14H7: Identification and Quantification of the 7-Hydroxytropolone Iron Complex as an Active Metabolite against *Dickeya*, the Causal Agent of Blackleg on the Potato Plant

## Summary

**Figure S1:** Growth kinetics of *Pseudomonas* PA14H7 in TY medium.

**Table S1:** Detailed composition of Bacto Tryptone (named T)

**Figure S2:** LC-MS (electrospray ionization in the positive ion mode: ESI<sup>+</sup>), base peak intensity (BPI) chromatograms of TY culture medium (A) and CFS-PA14H7 (B)

**Figure S3:** LCMS (ESI<sup>+</sup>) comparison of TY culture medium (left) and CFS-PA14H7 (right) chromatograms of aqueous phases after extraction with chloroform at pH 7 (A), chloroform at pH 2 (B), ethyl acetate pH 7 (C) or ethyl acetate pH 2 (D).

**Figure S4:** LCMS (ESI<sup>+</sup>) comparison of TY culture medium (left) and CFS-PA14H7 (right) chromatograms of organic phases after extraction with chloroform at pH 7 (A), chloroform at pH 2 (B), ethyl acetate pH 7 (C) or ethyl acetate pH 2 (D). Extraction performed on the same batch of TY and PA14H7 filtered supernatant.

**Table S2:** Optical Density at 600 nm (OD 600nm) measurement of organic and aqueous phases of CFS-PA14H7 extract with chloroform or ethyl acetate at pH 2 or pH 7 after 0 h, 24 h and 48 h of incubation with *D. solani*.

**Figure S5:** The reconstituted ion current (RIC) of the ions observed between 3.6 and 4.6 min at m/z 139.040 (A), m/z 329.983 (B) and m/z 658.957 (C) in TY culture medium (left) and CFS-PA14H7 (right).

**Table S3:** Summary of markers present in CFS-PA14H7 and absent in TY medium analyzed with marker lynx (Waters, Masslynx V4.2).

**Figure S6:** UV trace corresponding to the maximum of absorbance of the iron complex (B), absent in TY UV trace (A). Corresponding LC-MS (ESI<sup>+</sup>) BPI chromatograms for TY culture medium (C) and CFS-PA14H7 (D) highlighting the presence of the complex at m/z 329.983.

**Figure S7:** Ultra-Violet (UV) at 224 nm (blue) and 320 nm (purple) and Evaporative Light Scattering Diffusion (ELSD) (green) chromatograms of the flash chromatography purification of CFS-PA14H7 using a C18 column. Fraction F1 is highlighted in green, F2 in orange, and F3 in blue.

**Figure S8:** LC-MS (ESI<sup>+</sup>) chromatograms of fraction F2 resulting from CFS-PA14H7 purification by flash chromatography, BPI trace (A), RIC of the ions at m/z 139.040 (B) and m/z 329.983 (C). The purified iron complex is effectively detected between 3.80 and 4.40 min. The corresponding mass spectra are also depicted.

**Figure S9:** EI NIST library spectra of the different hypothesis for the molecular ion observed at m/z 138. 7-HT (A) and 2-ethoxyphenol and isomers (B).

**Figure S10:** Detailed NMR spectra of fraction F2 resulting from CFS-PA14H7 purification by flash chromatography: (A) <sup>1</sup>H NMR (400 MHz) and (B) <sup>13</sup>C NMR (100 MHz) .

**Figure S11:** Synthesis of 7-hydroxytropolone starting from commercial tropolone.

**Figure S12:** (A)  $^1\text{H}$  NMR and (B)  $^{13}\text{C}$  NMR spectra of 7-HT obtained by synthesis and (C)  $^1\text{H}$  NMR spectra and (D)  $^{13}\text{C}$  NMR spectra comparison of fraction F2 resulting from CFS-PA14H7 purification by flash chromatography (top) and synthetic 7-HT (bottom) between 6.3 and 9.1 ppm.

**Figure S13 :** GC-MS chromatograms and spectra of 7-HT obtained by synthesis (A, C) and of fraction F2 resulting from CFS-PA14H7 purification by flash chromatography (B, D).

**Figure S14:** Proposal fragmentation pattern of 7-HT iron complex ion ( $m/z$  329.983) by MS/MS (30 eV).

**Figure S15:** (a) UV spectrum of CFS-PA14H7 (1L, 48h) and of 7-HT of various concentrations in solution in TY (b) calibration curve of 7-HT in TY solution, at 327 nm ranging from 1.4 to 27.6 mg/L.

**Figure S16:** Standard curve performed with 7-HT synthetic molecule range from 0.07 mg/mL and 0.56 mg/mL according to LC-UV (320nm) (A), LC-MS ( $m/z$  329.983) (B) and GC-MS ( $m/z$  138) analysis (C).

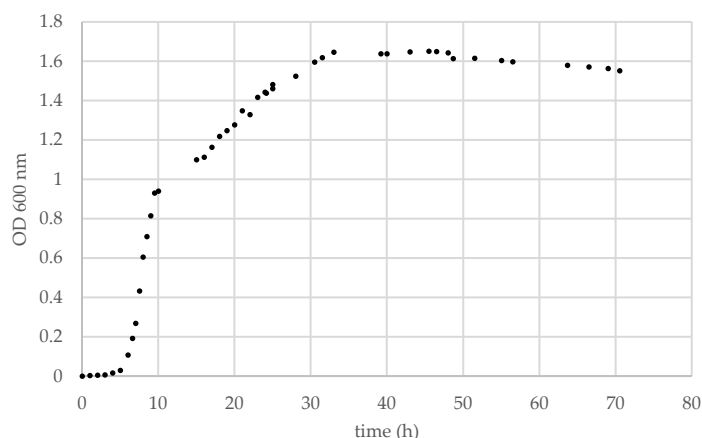

**Figure S1:** Growth kinetics of *Pseudomonas* PA14H7 in TY medium.

**Table S1:** Detailed composition of Bacto Tryptone (named T)

| Total nitrogen (%) | Amino nitrogen (%) | AN/TN | Total carbohydrate (mg/g) | Ash (%) | Loss on drying (%) | NaCl (%) | pH (1% solution) | Calcium (μg/g) | Iron (μg/g) | Magnesium (μg/g) | Potassium (μg/g) | Sodium (μg/g) | Chloride (%) | Sulfate (%) | Phosphate (%) | Alanine (% free) | Arginine (% free) | Asparagine (% free) | Aspartic acid (% free) | Cysteine (% free) | Glutamic acid (% free) | Glutamine (% free) | Glycine (% free) | Histidine (% free) | Isoleucine (% free) | Leucine (% free) | Lysine (% free) | Methionine (% free) | Phenylalanine (% free) | Proline (% free) | Serine (% free) | Threonine (% free) | Tryptophan (% free) | Tyrosine (% free) | Valine (% free) | Alanine (% total) | Arginine (% total) | Aspartic acid (% total) | Glutamic acid (% total) | Glycine (% total) | Histidine (% total) | Isoleucine (% total) | Leucine (% total) | Lysine (% total) | Methionine (% total)* | Phenylalanine (% total) | Proline (% total) | Serine (% total)* | Threonine (% total) | Tyrosine (% total) | Valine (% total) |
|--------------------|--------------------|-------|---------------------------|---------|--------------------|----------|------------------|----------------|-------------|------------------|------------------|---------------|--------------|-------------|---------------|------------------|-------------------|---------------------|------------------------|-------------------|------------------------|--------------------|------------------|--------------------|---------------------|------------------|-----------------|---------------------|------------------------|------------------|-----------------|--------------------|---------------------|-------------------|-----------------|-------------------|--------------------|-------------------------|-------------------------|-------------------|---------------------|----------------------|-------------------|------------------|-----------------------|-------------------------|-------------------|-------------------|---------------------|--------------------|------------------|
| 13.3               | 5.3                | 0.4   | 4.3                       | 6.6     | 2.3                | 0.0      | 7.3              | 256            | 23.0        | 195              | 3257             | 33910         | 0.06         | 0.33        | 2.58          | 1.0              | 2.2               | 0.6                 | 0.4                    | 0.3               | 1.4                    | 0.1                | 0.2              | 0.5                | 1.3                 | 4.8              | 5.5             | 1.0                 | 3.0                    | 0.2              | 0.7             | 0.7                | 0.8                 | 0.5               | 1.7             | 3.2               | 5.0                | 5.2                     | 15.1                    | 1.7               | 1.9                 | 5.5                  | 7.5               | 6.2              | 2.1                   | 5.2                     | 6.6               | 2.2               | 1.8                 | 1.3                | 5.9              |

Legend  
 □ Free amino acids □ Total amino acids  
 0.0 Below limit of detection

\*Composition of Bacto Yeast extract (named Y) was not available from the provider.

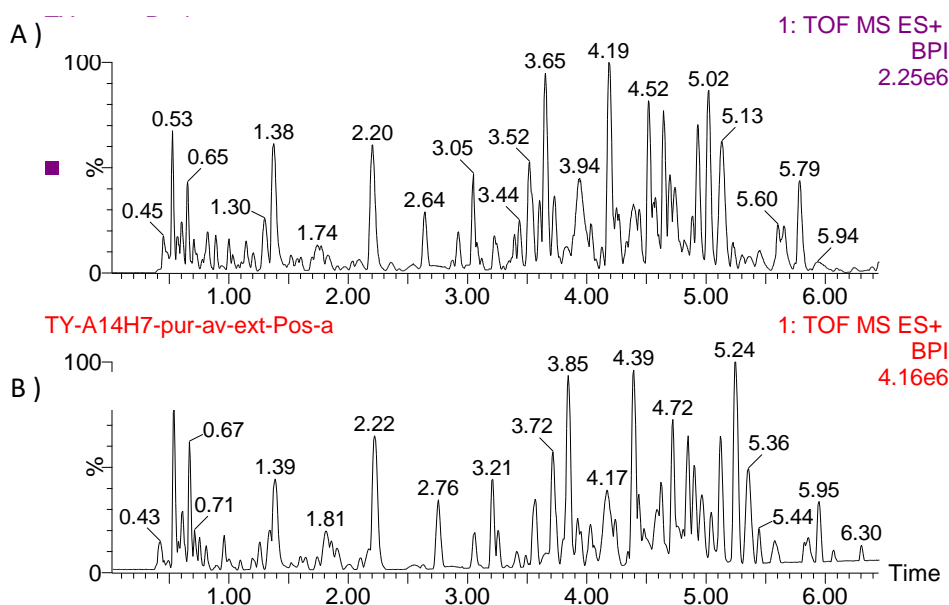

**Figure S2:** LC-MS (electrospray ionization in the positive ion mode: ESI<sup>+</sup>), base peak intensity (BPI) chromatograms of TY culture medium (A) and CFS-PA14H7 (B)

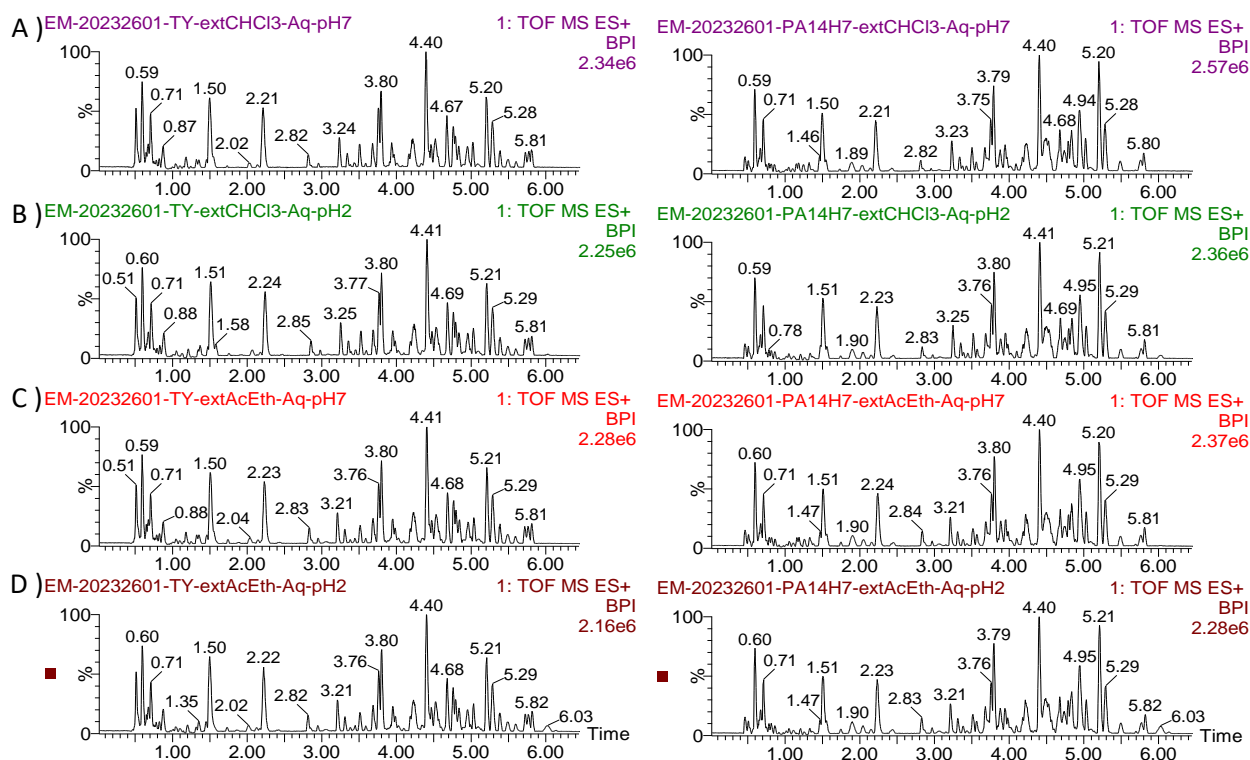

**Figure S3:** LC-MS (ESI<sup>+</sup>) comparison of TY culture medium (left) and CFS-PA14H7 (right) BPI chromatograms for aqueous phases after extraction with chloroform at pH 7 (A), chloroform at pH 2 (B), ethyl acetate pH 7 (C) or ethyl acetate pH 2 (D).

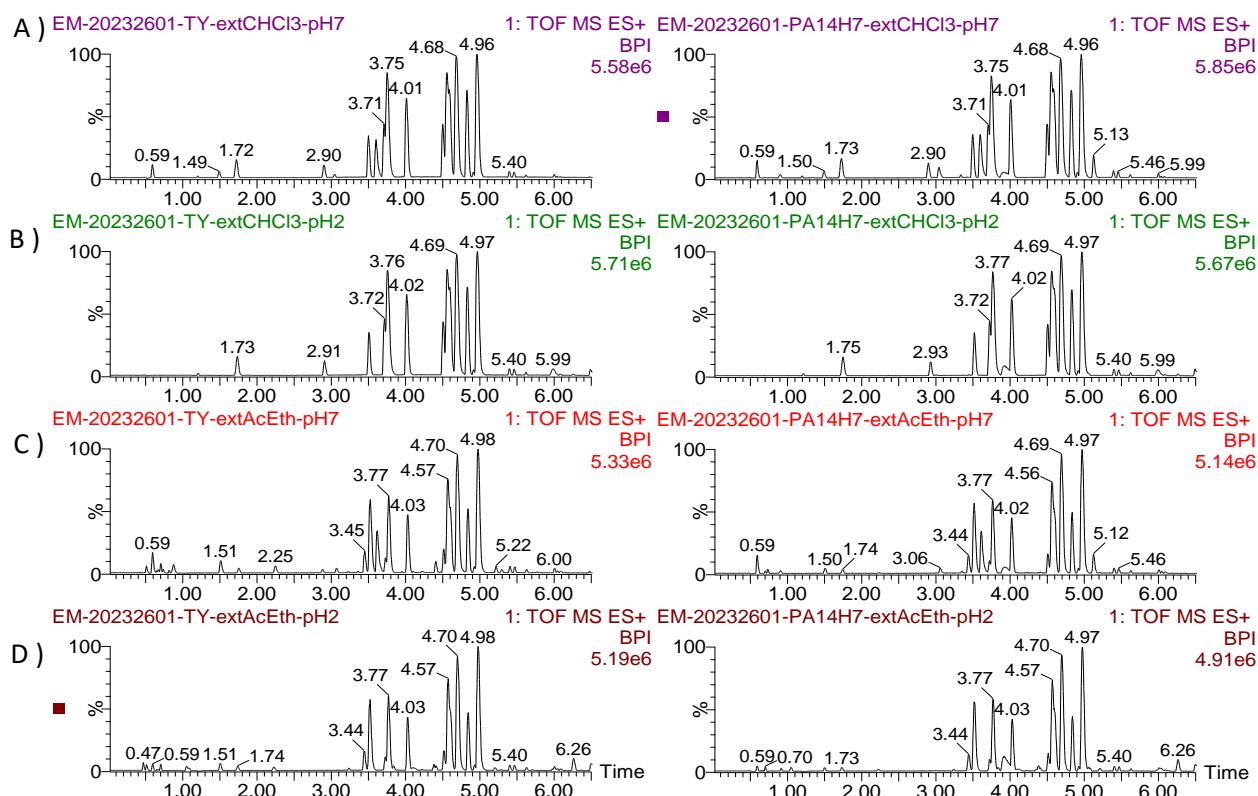

**Figure S4:** LC-MS (ESI<sup>+</sup>) comparison of TY culture medium (left) and CFS-PA14H7 (right) BPI chromatograms of organic phases after extraction with chloroform at pH 7 (A), chloroform at pH 2 (B), ethyl acetate pH 7 (C) or ethyl acetate pH 2 (D). Extraction performed on the same batch of TY and PA14H7 filtered supernatant.

**Table S2:** Optical Density at 600 nm (OD 600nm) measurement of organic and aqueous phases of CFS-PA14H7 extract with chloroform or ethyl acetate at pH 2 or pH 7 after 0 h, 24 h and 48 h of incubation with *D. solani*.

| Extraction method of CFS-PA14H7 |      | dilution | Organic phase |       |       | Aqueous phase |       |       |
|---------------------------------|------|----------|---------------|-------|-------|---------------|-------|-------|
|                                 |      |          | t0            | t24   | t48   | t0            | t24   | t48   |
| Chloroform                      | pH 2 | control  | 0.043         | 0.044 | 0.044 | 0.040         | 0.040 | 0.040 |
|                                 |      | pur      | 0.058         | 0.060 | 0.071 | 0.043         | 0.042 | 0.043 |
|                                 |      | 1/2      | 0.052         | 0.055 | 0.055 | 0.041         | 0.041 | 0.041 |
|                                 |      | 1/4      | 0.044         | 0.044 | 0.045 | 0.041         | 0.040 | 0.040 |
|                                 |      | 1/10     | 0.045         | 0.044 | 0.045 | 0.040         | 0.041 | 0.041 |
|                                 |      | 1/20     | 0.042         | 0.042 | 0.042 | 0.041         | 0.042 | 0.041 |
|                                 |      | 1/100    | 0.042         | 0.131 | 0.189 | 0.041         | 0.174 | 0.198 |
|                                 |      | 1/200    | 0.041         | 0.144 | 0.213 | 0.040         | 0.176 | 0.178 |
|                                 |      | 1/1000   | 0.042         | 0.131 | 0.211 | 0.041         | 0.120 | 0.201 |
|                                 | pH 7 | control  | 0.044         | 0.044 | 0.044 | 0.052         | 0.041 | 0.041 |
|                                 |      | pur      | 0.070         | 0.066 | 0.061 | 0.047         | 0.213 | 0.277 |
|                                 |      | 1/2      | 0.053         | 0.050 | 0.049 | 0.042         | 0.170 | 0.222 |
|                                 |      | 1/4      | 0.046         | 0.045 | 0.045 | 0.040         | 0.147 | 0.218 |
|                                 |      | 1/10     | 0.045         | 0.043 | 0.043 | 0.042         | 0.147 | 0.209 |
|                                 |      | 1/20     | 0.043         | 0.042 | 0.044 | 0.041         | 0.171 | 0.185 |
|                                 |      | 1/100    | 0.041         | 0.137 | 0.178 | 0.041         | 0.185 | 0.180 |
|                                 |      | 1/200    | 0.041         | 0.188 | 0.193 | 0.040         | 0.189 | 0.182 |
|                                 |      | 1/1000   | 0.041         | 0.126 | 0.206 | 0.041         | 0.133 | 0.198 |
| Ethyl acetate                   | pH 2 | control  | 0.041         | 0.042 | 0.041 | 0.040         | 0.041 | 0.041 |
|                                 |      | pur      | 0.053         | 0.053 | 0.060 | 0.043         | 0.287 | 0.269 |
|                                 |      | 1/2      | 0.046         | 0.047 | 0.047 | 0.042         | 0.163 | 0.245 |
|                                 |      | 1/4      | 0.046         | 0.046 | 0.046 | 0.041         | 0.154 | 0.238 |
|                                 |      | 1/10     | 0.043         | 0.043 | 0.043 | 0.042         | 0.153 | 0.231 |
|                                 |      | 1/20     | 0.043         | 0.043 | 0.044 | 0.044         | 0.162 | 0.222 |
|                                 |      | 1/100    | 0.042         | 0.094 | 0.166 | 0.041         | 0.157 | 0.214 |
|                                 |      | 1/200    | 0.041         | 0.146 | 0.203 | 0.041         | 0.157 | 0.198 |
|                                 |      | 1/1000   | 0.042         | 0.161 | 0.202 | 0.042         | 0.164 | 0.206 |
|                                 | pH 7 | control  | 0.043         | 0.043 | 0.045 | 0.039         | 0.040 | 0.040 |
|                                 |      | pur      | 0.045         | 0.045 | 0.045 | 0.042         | 0.167 | 0.386 |
|                                 |      | 1/2      | 0.042         | 0.043 | 0.043 | 0.040         | 0.139 | 0.282 |
|                                 |      | 1/4      | 0.041         | 0.041 | 0.041 | 0.039         | 0.141 | 0.226 |
|                                 |      | 1/10     | 0.042         | 0.041 | 0.041 | 0.039         | 0.129 | 0.209 |
|                                 |      | 1/20     | 0.041         | 0.042 | 0.042 | 0.039         | 0.128 | 0.208 |
|                                 |      | 1/100    | 0.040         | 0.119 | 0.182 | 0.041         | 0.156 | 0.215 |
|                                 |      | 1/200    | 0.040         | 0.129 | 0.213 | 0.039         | 0.172 | 0.215 |
|                                 |      | 1/1000   | 0.040         | 0.133 | 0.202 | 0.041         | 0.149 | 0.198 |

Negative controls are used to verify the absence of contamination of extracts and medium used. The combination where no bacterial growth is observed after 48 h of incubation (green) are enumerated on Petri dish for the determination of bactericidal/bacteriostatic effect.

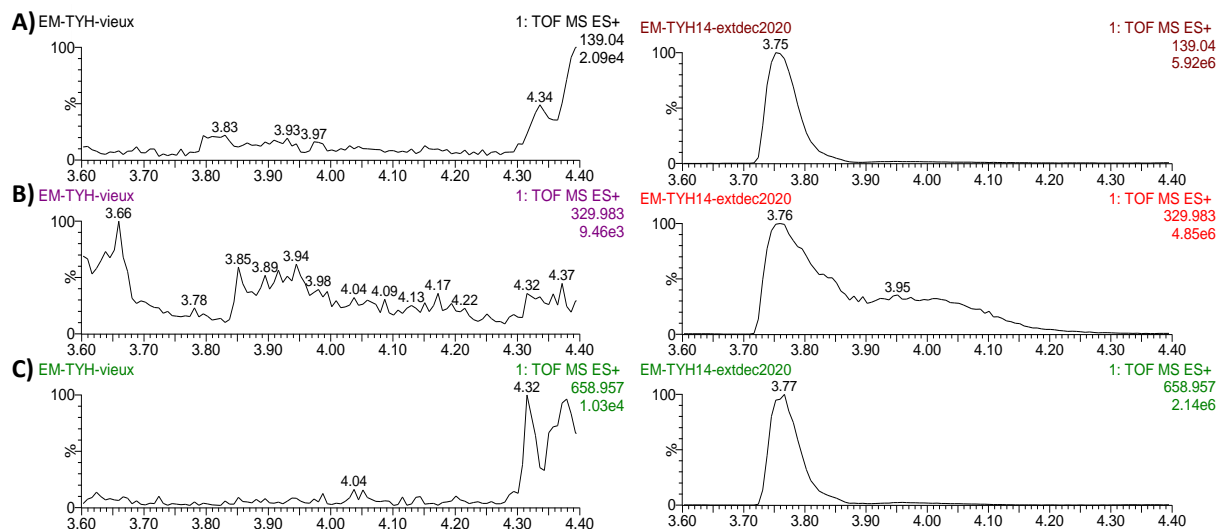

**Figure S5:** The reconstituted ion current (RIC) of the ions observed between 3.6 and 4.6 min at m/z 139.040 (A), m/z 329.983 (B) and m/z 658.957 (C) in TY culture medium (left) and CFS-PA14H7 (right).

**Table S3:** Summary of markers present in CFS-PA14H7 and absent in TY medium analyzed with marker lynx (Waters, Masslynx V4.2).

| Ret. Time | m/z      | Included | Saturated | EM-081221-<br>MeOH-a | EM-081221-<br>extTY- | EM-081221-<br>extA14H7-<br>CHCl3-a | EM-081221-<br>MeOH-b | EM-081221-<br>extTY- | EM-081221-<br>extA14H7-<br>CHCl3-b | EM-081221-<br>MeOH-c | EM-081221-<br>extTY- | EM-081221-<br>extA14H7-<br>CHCl3-c | MOY-MeOH | MOY-extTY | MOY-ext CFS-<br>PA14H7 |
|-----------|----------|----------|-----------|----------------------|----------------------|------------------------------------|----------------------|----------------------|------------------------------------|----------------------|----------------------|------------------------------------|----------|-----------|------------------------|
| 3.5814    | 329.9821 | Yes      | No        | 0                    | 0                    | 64.2733                            | 0                    | 0                    | 74.0706                            | 0                    | 0                    | 67.0571                            | 0.0000   | 0.0000    | 68.4670                |
| 3.5631    | 139.0393 | Yes      | No        | 0                    | 0                    | 26.5547                            | 0                    | 0                    | 28.0006                            | 0                    | 0                    | 29.36                              | 0.0000   | 0.0000    | 27.9718                |
| 2.6099    | 107.0497 | Yes      | No        | 0                    | 0                    | 0                                  | 0                    | 0                    | 25.5209                            | 0                    | 0                    | 26.8061                            | 0.0000   | 0.0000    | 17.4423                |
| 5.4185    | 473.2756 | Yes      | No        | 0                    | 0                    | 15.6818                            | 0                    | 0                    | 16.2169                            | 0                    | 0                    | 16.4323                            | 0.0000   | 0.0000    | 16.1103                |
| 3.6385    | 197.1290 | Yes      | No        | 0                    | 0                    | 0                                  | 0                    | 0                    | 26.6137                            | 0                    | 0                    | 21.5049                            | 0.0000   | 0.0000    | 16.0395                |
| 4.8521    | 430.7162 | Yes      | No        | 0                    | 0                    | 12.8648                            | 0                    | 0                    | 13.6696                            | 0                    | 0                    | 13.8827                            | 0.0000   | 0.0000    | 13.4724                |
| 4.6698    | 860.4260 | Yes      | No        | 0                    | 0                    | 14.2627                            | 0                    | 0                    | 9.6497                             | 0                    | 0                    | 14.3276                            | 0.0000   | 0.0000    | 12.7467                |
| 4.8537    | 609.3388 | Yes      | No        | 0                    | 0                    | 12.3265                            | 0                    | 0                    | 12.219                             | 0                    | 0                    | 12.0869                            | 0.0000   | 0.0000    | 12.2108                |
| 4.2119    | 540.3383 | Yes      | No        | 0                    | 0                    | 11.8303                            | 0                    | 0                    | 11.9083                            | 0                    | 0                    | 11.9421                            | 0.0000   | 0.0000    | 11.8936                |
| 4.8505    | 860.4267 | Yes      | No        | 0                    | 0                    | 10.9442                            | 0                    | 0                    | 11.7755                            | 0                    | 0                    | 12.3206                            | 0.0000   | 0.0000    | 11.6801                |
| 4.9946    | 746.3832 | Yes      | No        | 0                    | 0                    | 10.7787                            | 0                    | 0                    | 11.7357                            | 0                    | 0                    | 11.8424                            | 0.0000   | 0.0000    | 11.4523                |
| 5.2181    | 657.3956 | Yes      | No        | 0                    | 0                    | 10.4574                            | 0                    | 0                    | 10.4247                            | 0                    | 0                    | 10.4402                            | 0.0000   | 0.0000    | 10.4408                |

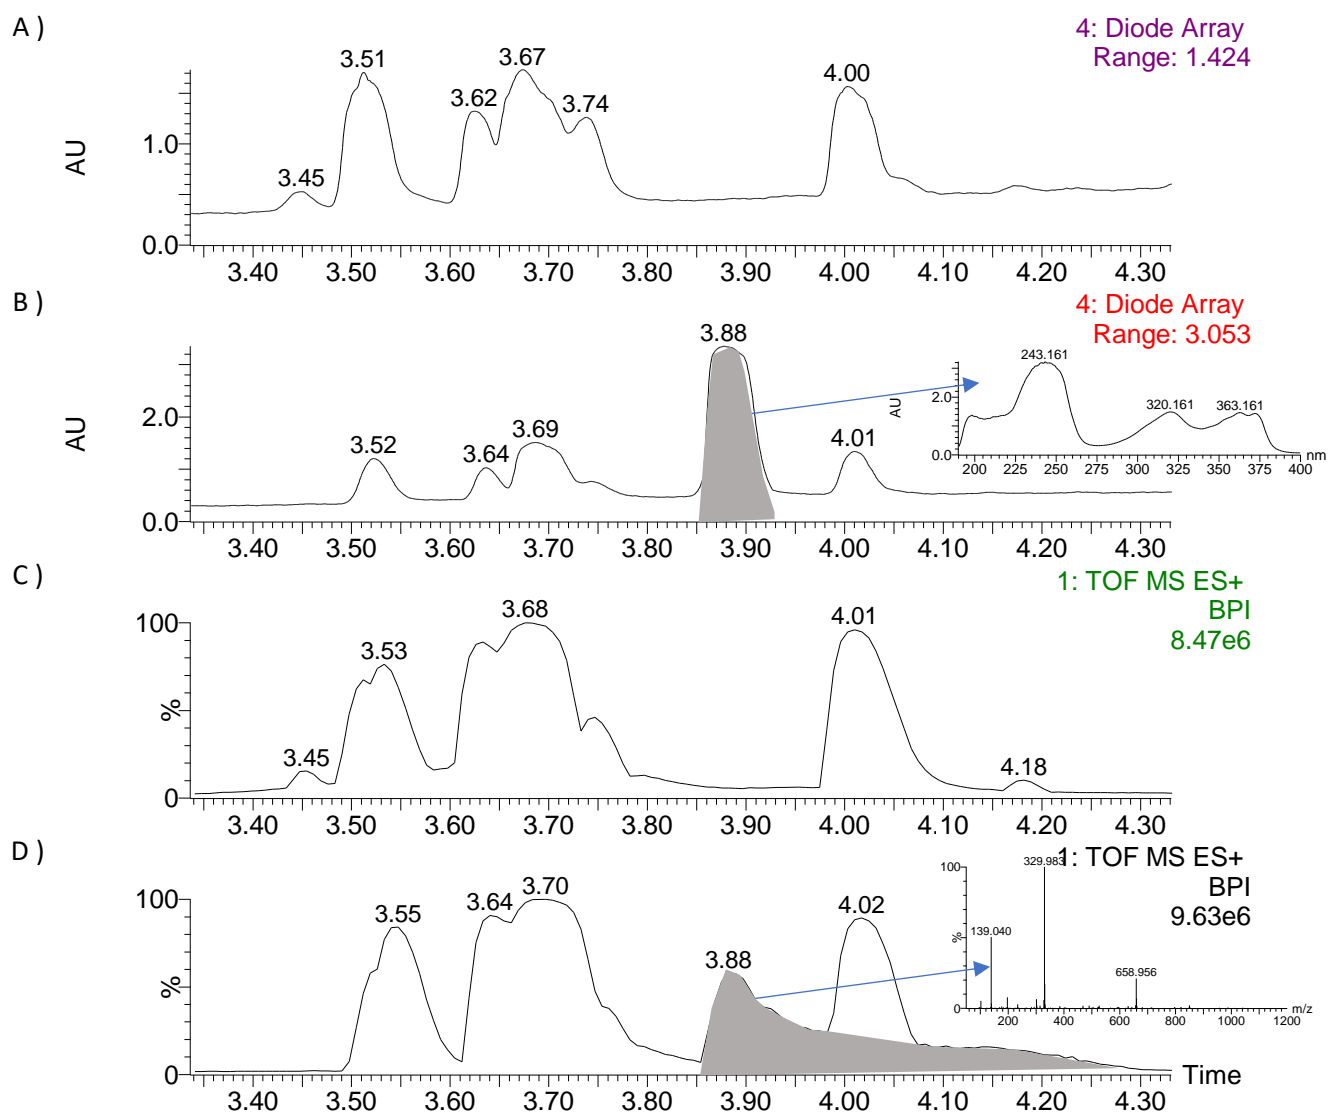

**Figure S6:** UV trace corresponding to the maximum of absorbance of the iron complex (B), absent in TY UV trace (A). Corresponding LC-MS (ESI<sup>+</sup>) BPI chromatograms for TY culture medium (C) and CFS-PA14H7 (D) highlighting the presence of the complex at  $m/z$  329.983.

|                            |                      |                        |                         |
|----------------------------|----------------------|------------------------|-------------------------|
| Column: FP ECOFLEX C18 12g | Solvent A: Water     | UV Threshold: N/A      | ELSD Threshold: N/A     |
| Flow Rate: 30 mL/min       | Solvent B: Methanol  | UV Sensitivity: Low    | ELSD Sensitivity: Low   |
| Equilibration: 4.8 min     | Solvent C: Empty     | UV1 Wavelength: 244 nm | Collection: Collect All |
| Run Length: 34.0 min       | Solvent D: Empty     | UV2 Wavelength: 320 nm | Per-Vial Volume: 10 mL  |
| Mode: Flash Liquid         | Slope Detection: Off | UV3 Wavelength: N/A    | Non-Peak Volume: 10 mL  |

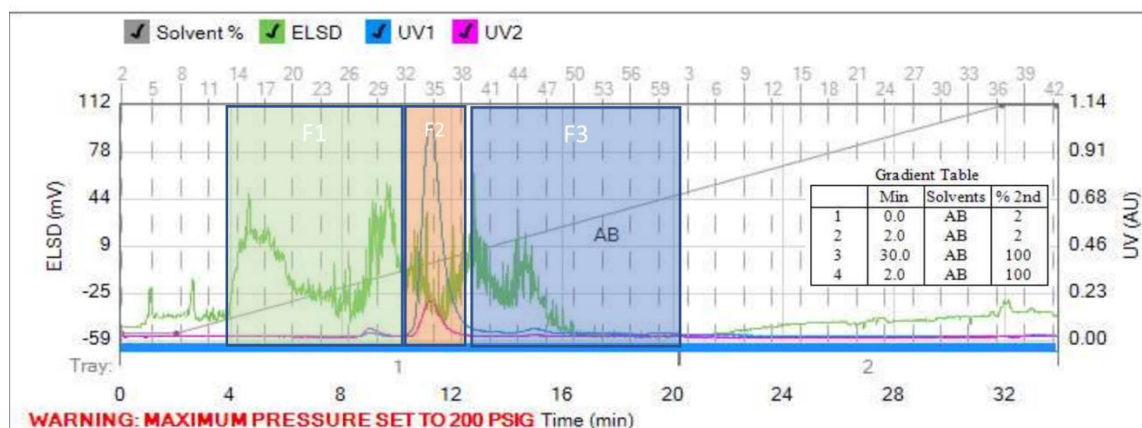

**Figure S7:** Ultra-Violet (UV) at 224 nm (blue) and 320 nm (purple) and Evaporative Light Scattering Diffusion (ELSD) (green) chromatograms of the flash chromatography purification of CFS-PA14H7 using a C18 column. Fraction F1 is highlighted in green, F2 in orange, and F3 in blue.

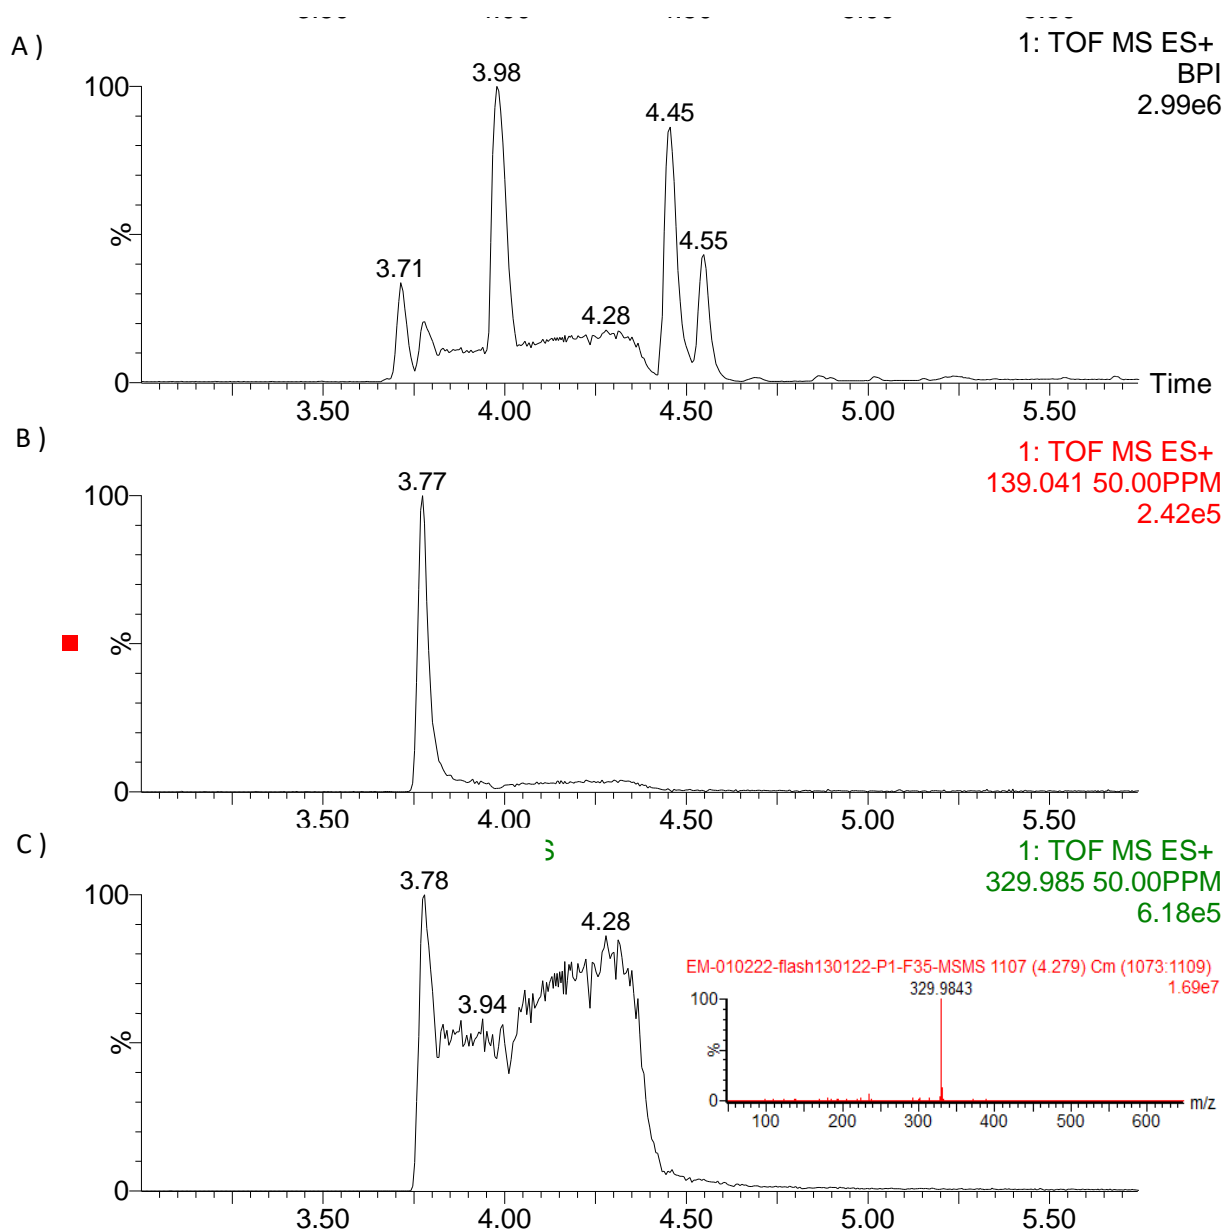

**Figure S8:** LC-MS (ESI+) chromatograms of fraction F2 resulting from CFS-PA14H7 purification by flash chromatography, BPI trace (A), RIC of the ions at  $m/z$  139.040 (B) and  $m/z$  329.983 (C). The purified iron complex is effectively detected between 3.80 and 4.40 min. The corresponding mass spectra are also depicted.



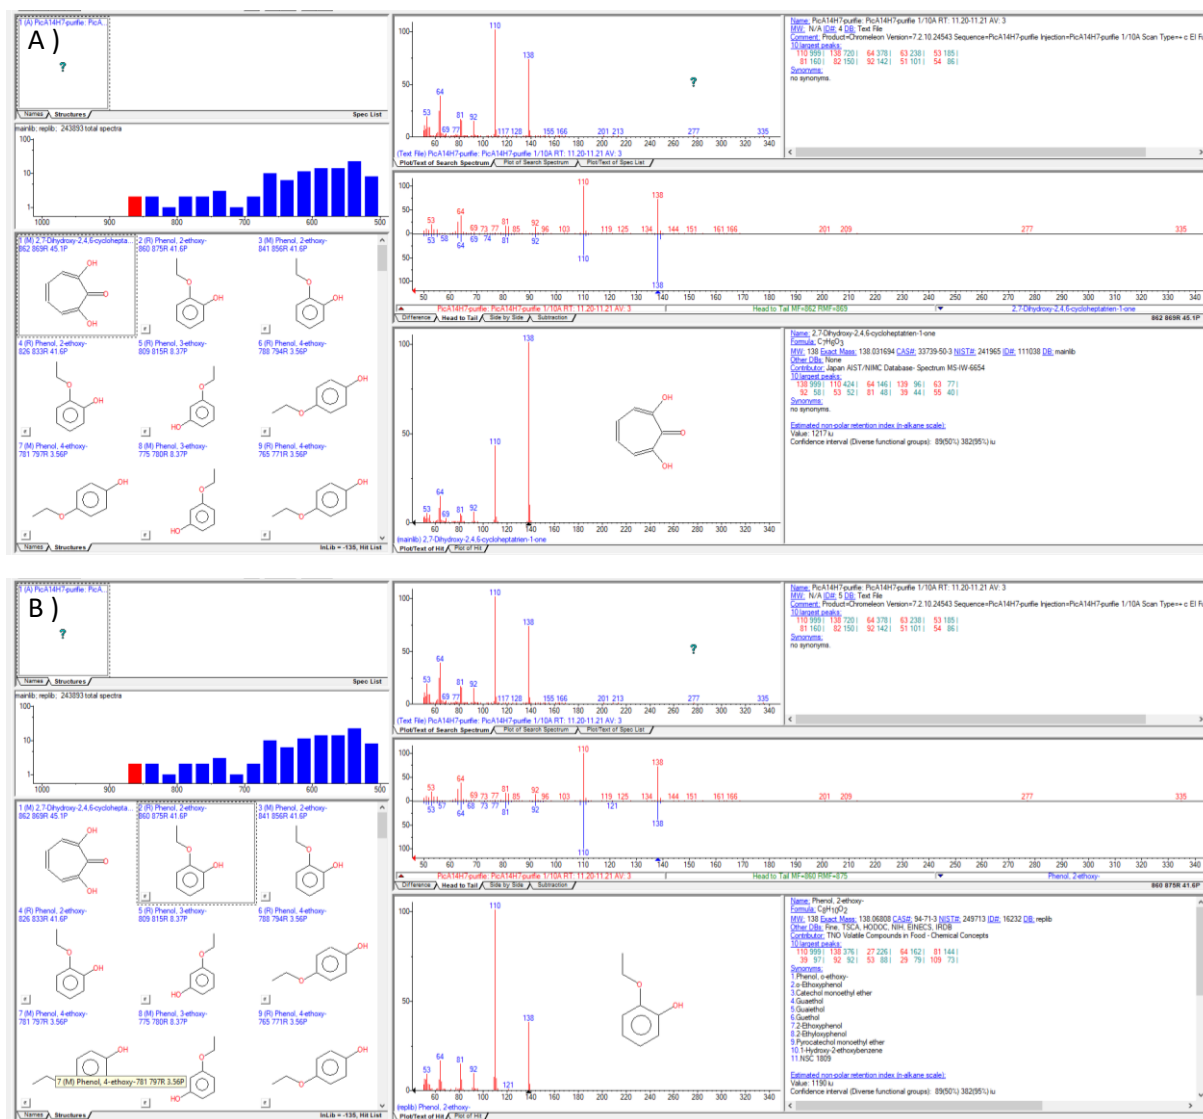

**Figure S9:** EI NIST library spectra of the different hypothesis for the molecular ion observed at  $m/z$  138. 7-HT (A) and 2-ethoxyphenol and isomers (B).

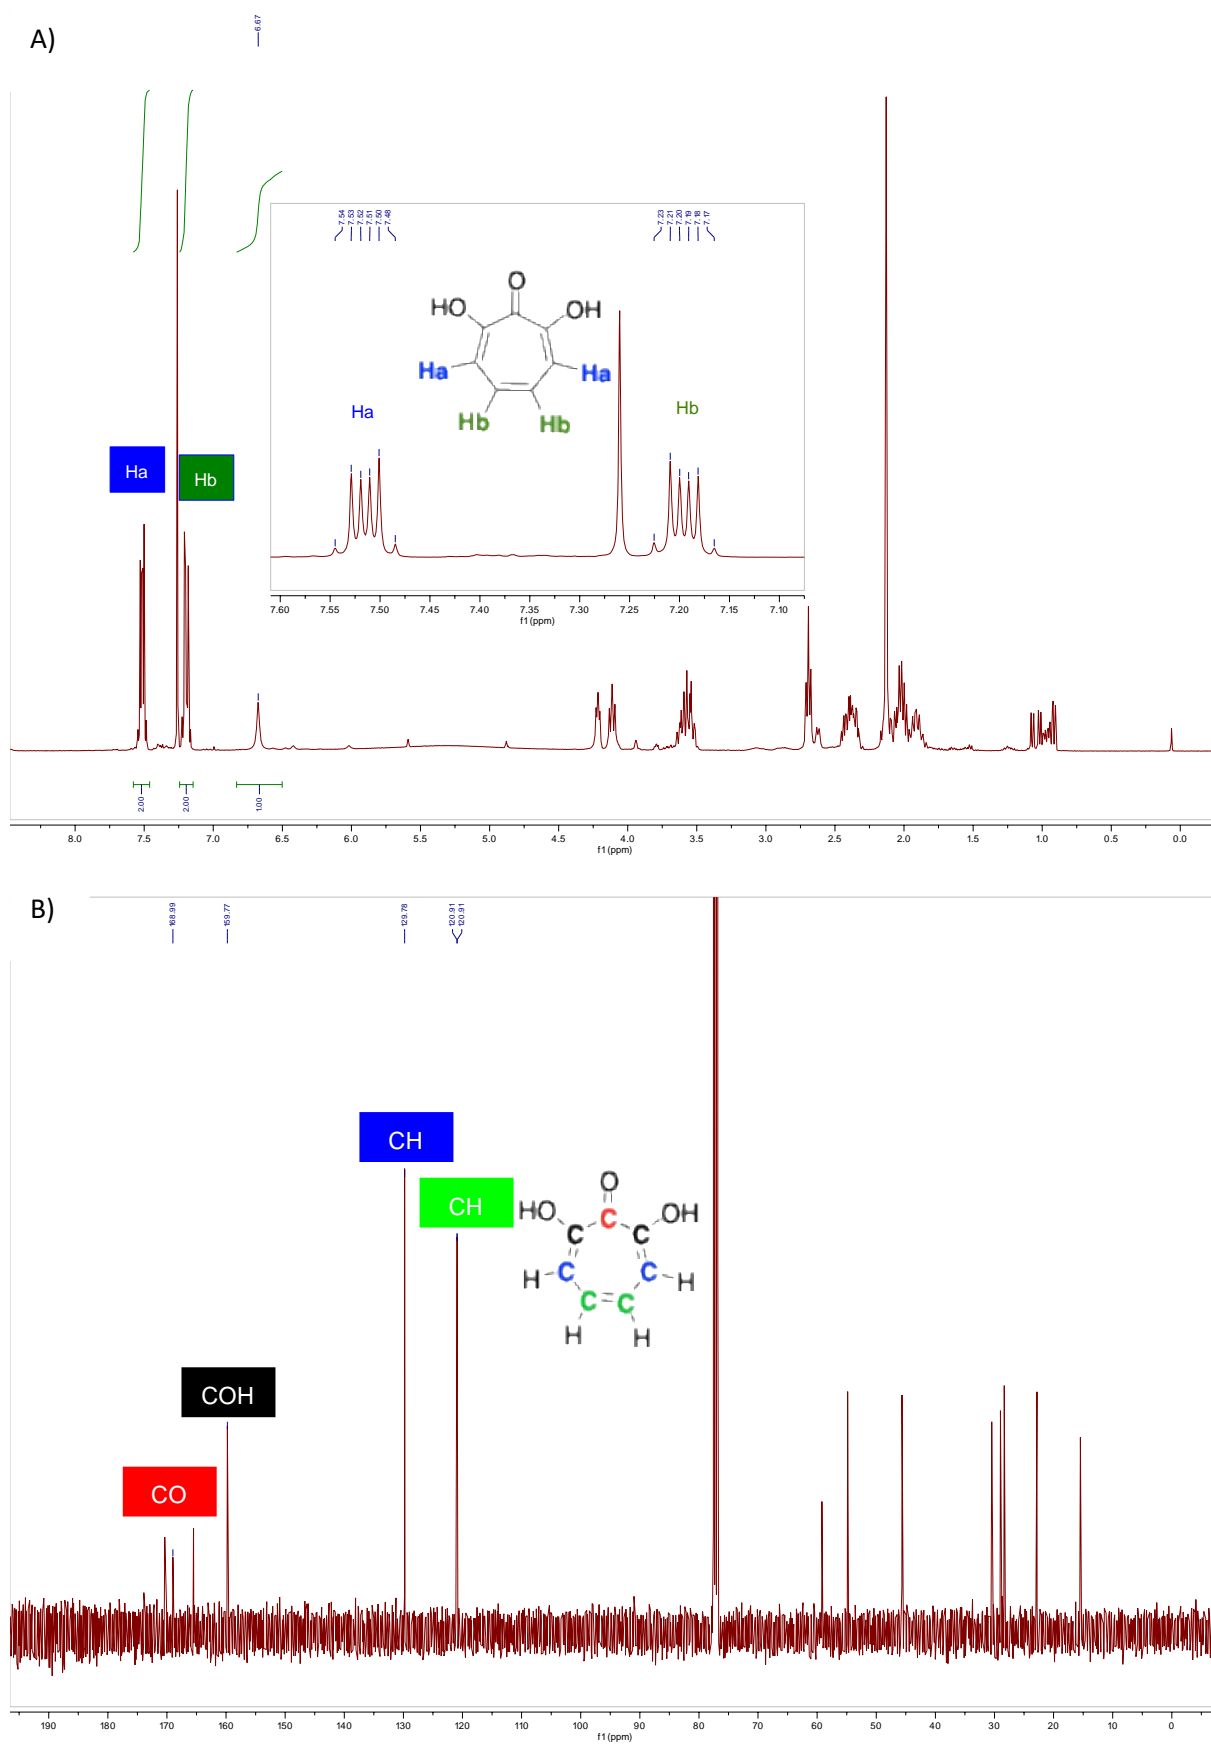

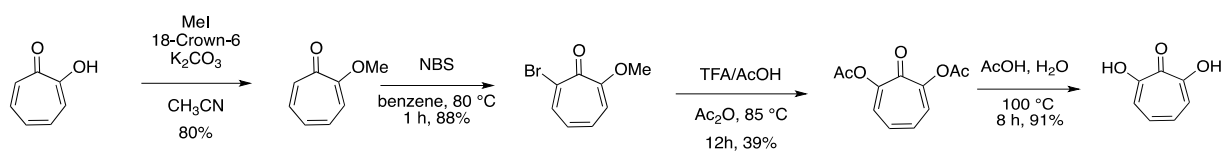

**Figure S11:** Synthesis of 7-hydroxytropolone starting from commercial tropolone. From Winter, N.; Trauner ; D. *J. Am. Chem. Soc.* **2017**, 139, 11706-11709 and Takeshita, H.; Mori, A. *Synthesis* **1985**, 578-579. The final product was recrystallized in toluene.

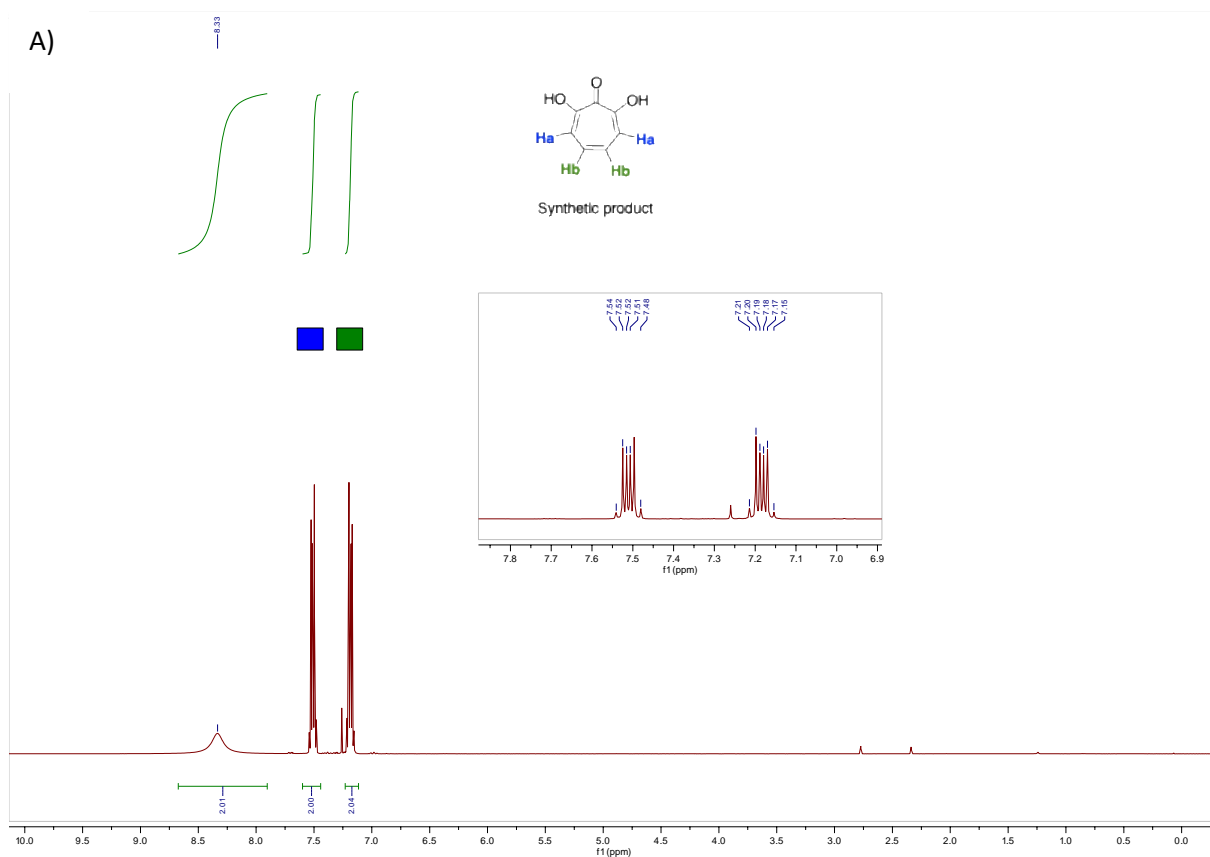

B) fid

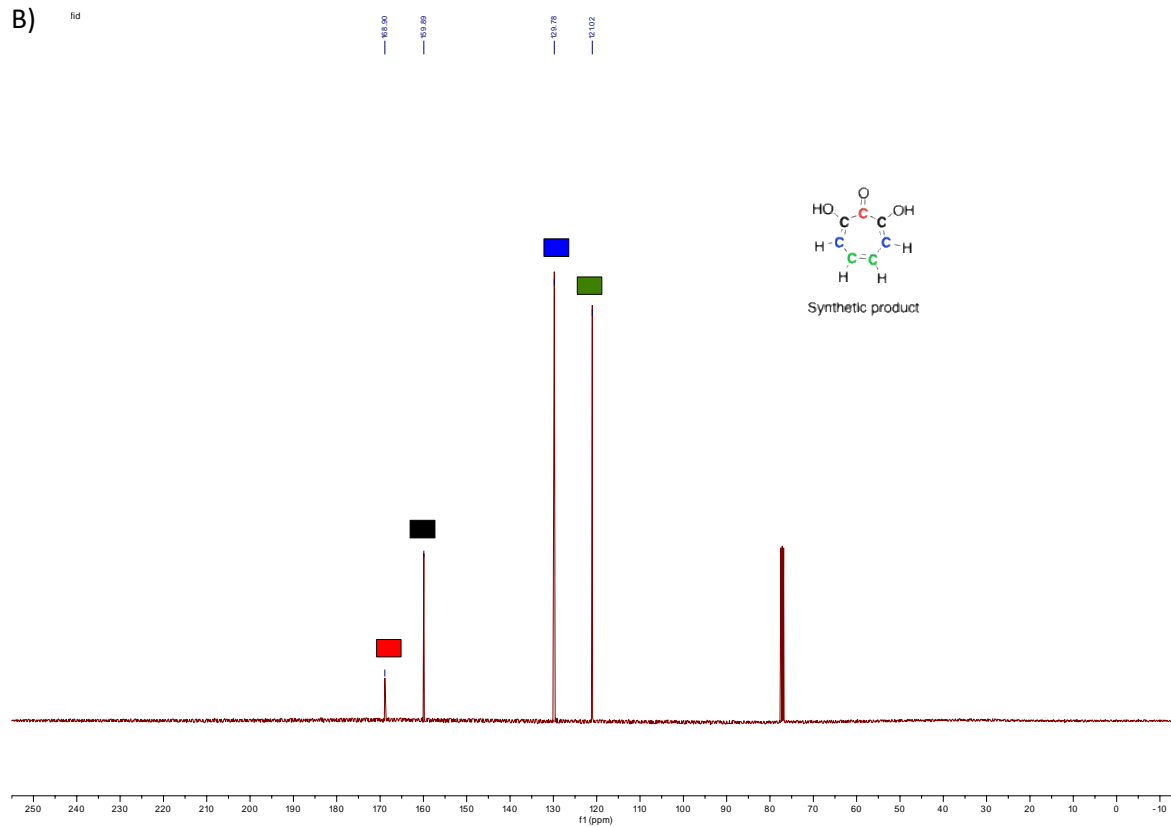

C)

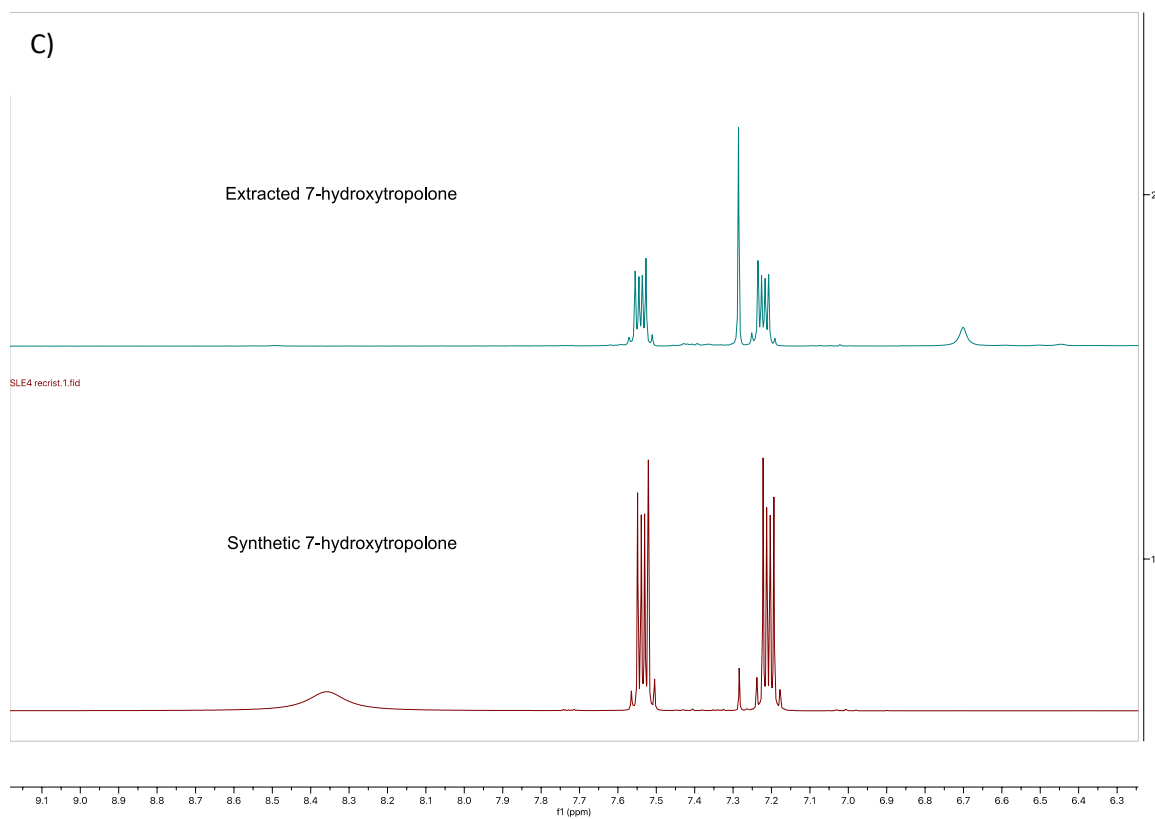

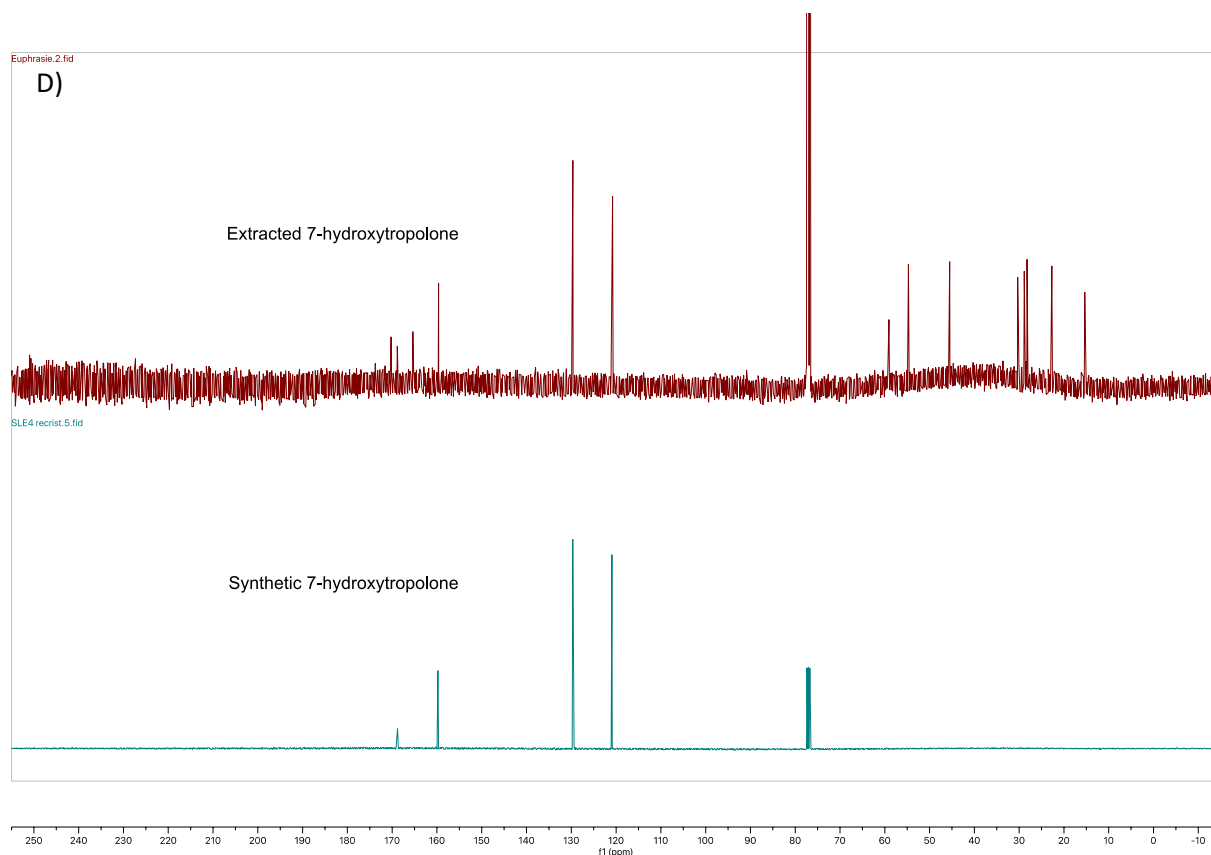

**Figure S12:** (A)  $^1\text{H}$  NMR and (B)  $^{13}\text{C}$  NMR spectra of 7-HT obtained by synthesis and (C)  $^1\text{H}$  NMR spectra and (D)  $^{13}\text{C}$  NMR spectra comparison of fraction F2 resulting from CFS-PA14H7 purification by flash chromatography (top) and synthetic 7-HT (bottom) between 6.3 and 9.1 ppm.

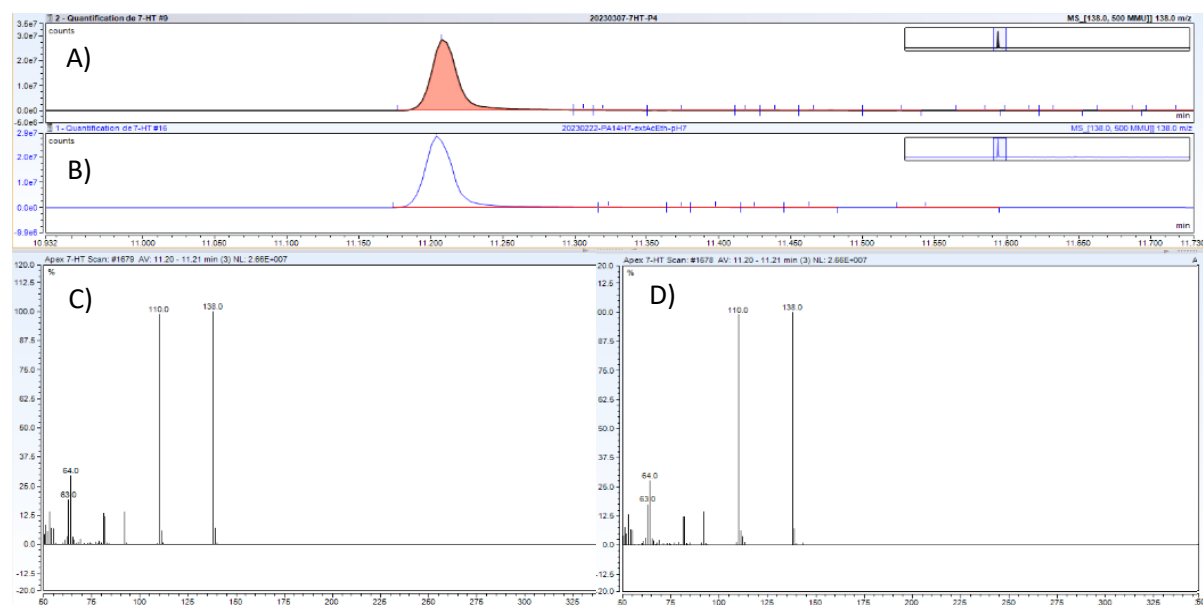

**Figure S13:** GC-MS chromatograms and spectra of 7-HT obtained by synthesis (A, C) and of fraction F2 resulting from CFS-PA14H7 purification by flash chromatography (B, D).

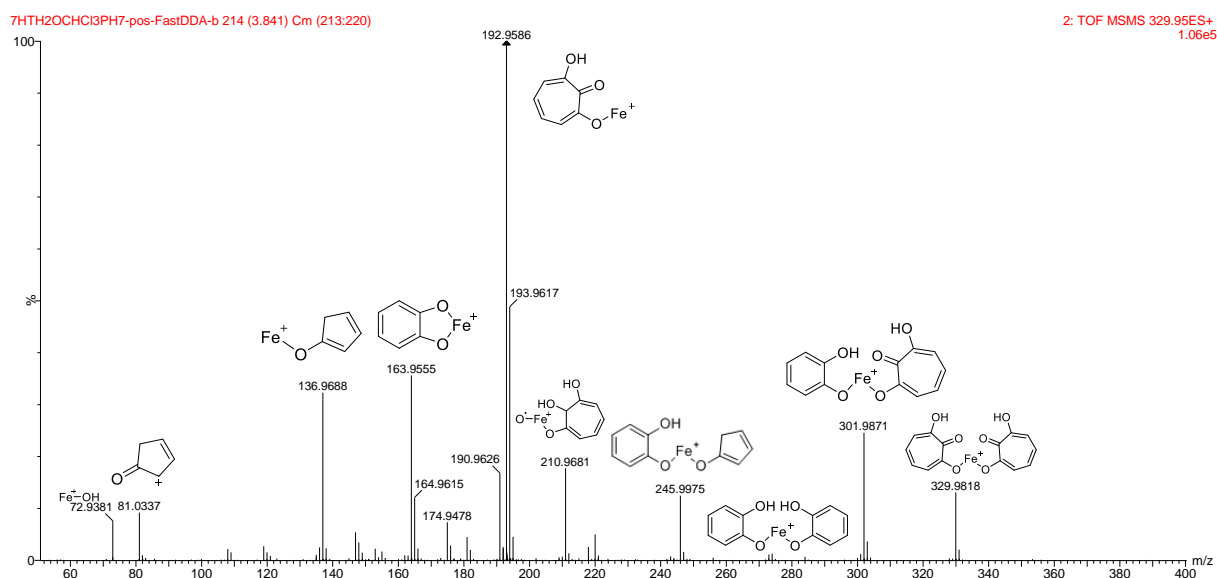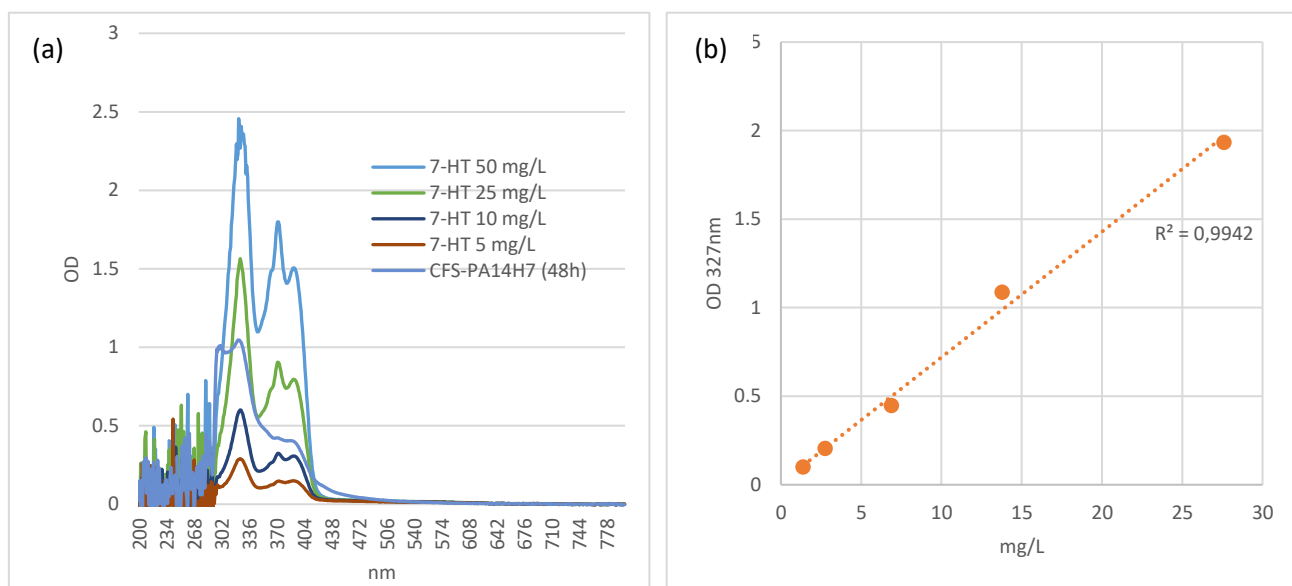

**Figure S15:** (a) UV spectrum of CFS-PA14H7 (1L, 48h) and of 7-HT of various concentrations in solution in TY (b) calibration curve of 7-HT in TY solution, at 327 nm ranging from 1.4 to 27.6 mg/L.

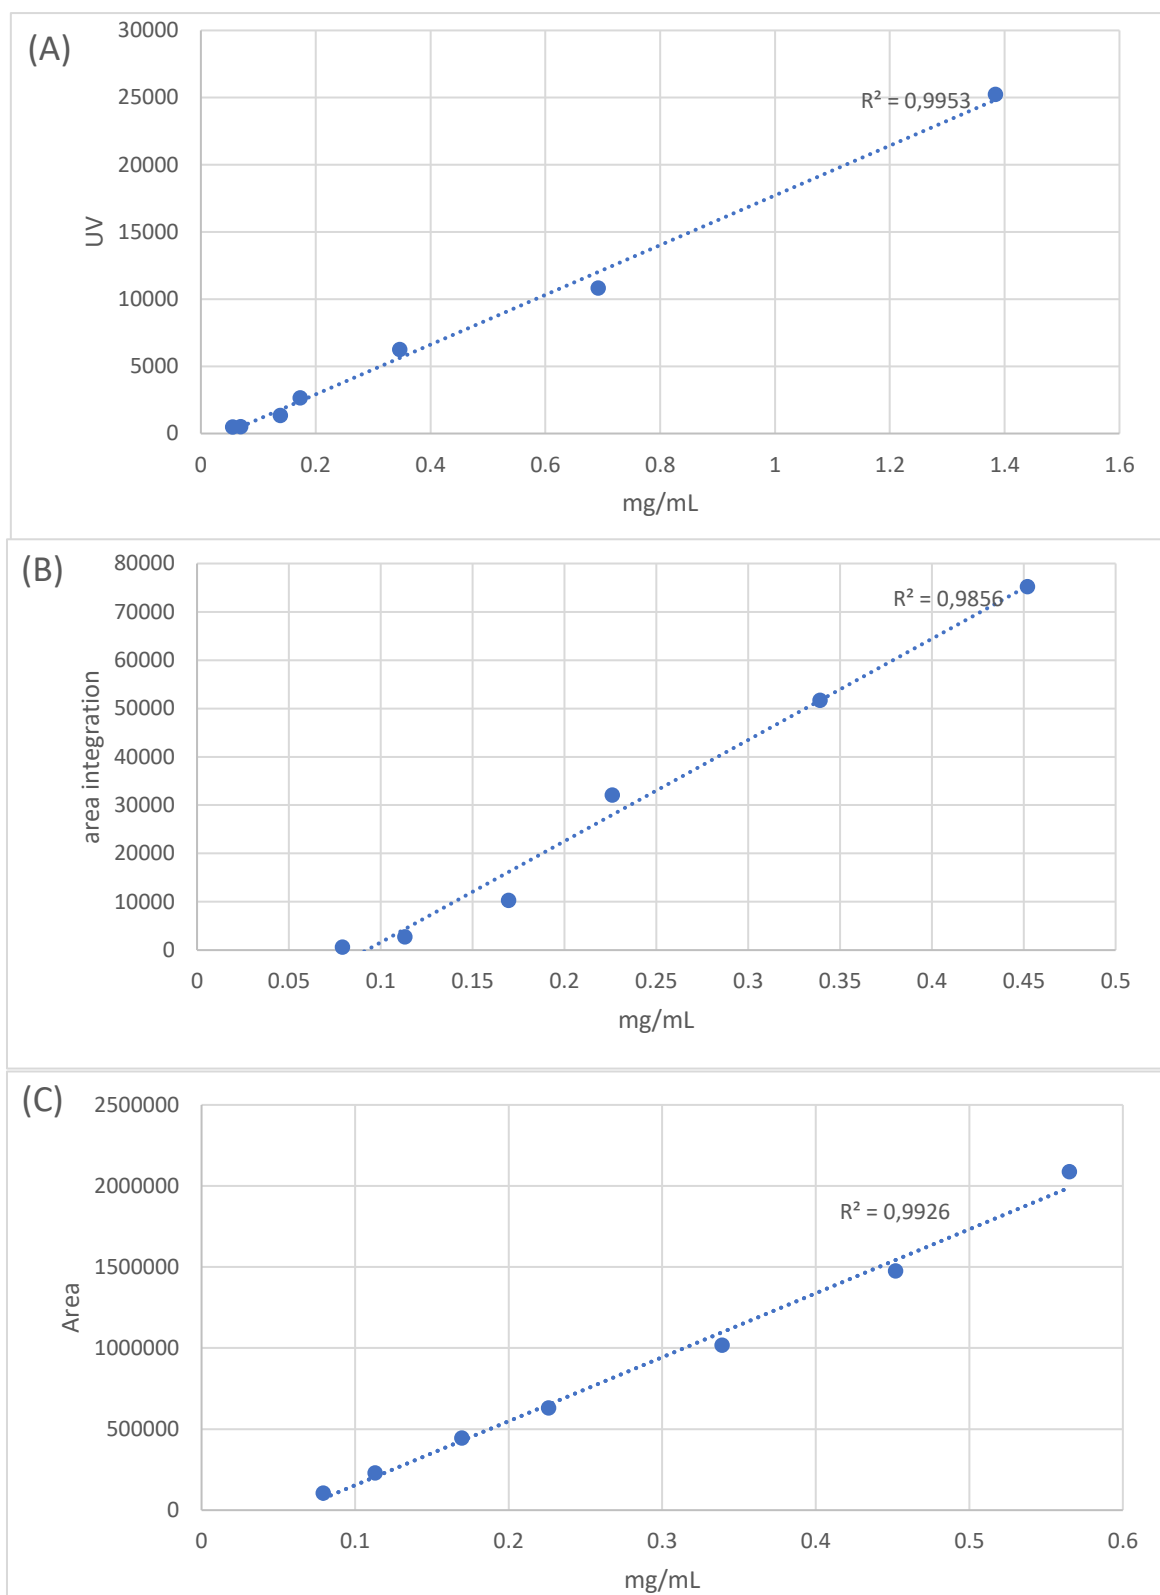

**Figure S16:** Standard curve performed with 7-HT synthetic molecule range from 0.07 mg/mL and 0.56 mg/mL according to LC-UV (320nm) (A), LC-MS (m/z 329.983) (B) and GC-MS (m/z 138) analysis (C).
